# Supplementary material for: Culturally transmitted song exchange between humpback whales (Megaptera novaeangliae) in the southeast Atlantic and southwest Indian Ocean basins
Source: PubMed Central journal article supplement (PMC6281946; doi:10.1098/rsos.172305), 2018-11-28
Supplement: rsos172305supp1.pdf [file rsos172305supp1.pdf]

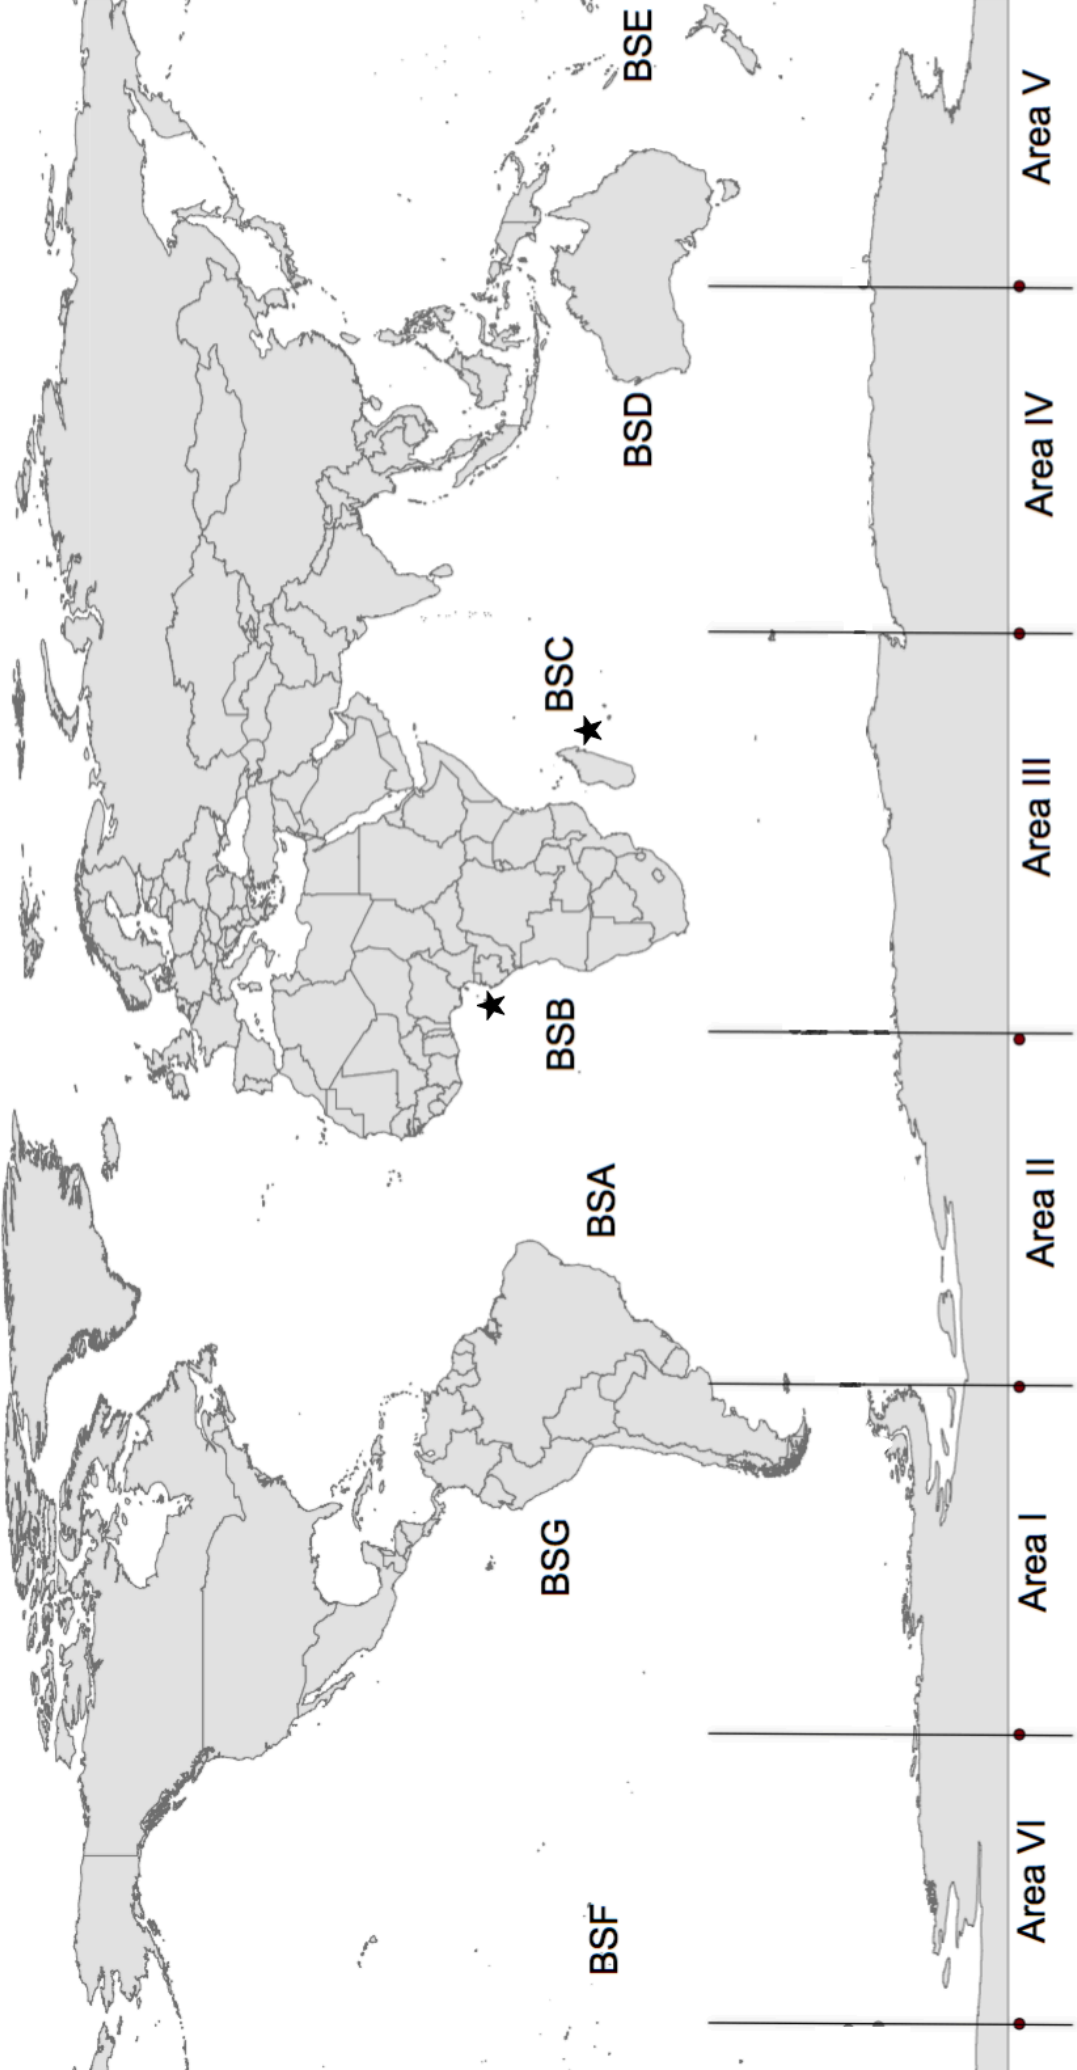

Area VI

Area I

Area II

Area III

Area IV

Area V

BSF

BSG

BSA

BSB

BSC

BSD

BSE
