# Supplementary material for: Culturally transmitted song exchange between humpback whales (Megaptera novaeangliae) in the southeast Atlantic and southwest Indian Ocean basins
Source: PubMed Central journal article supplement (PMC6281946; doi:10.1098/rsos.172305), 2018-11-28
Supplement: rsos172305supp2.pdf [file rsos172305supp2.pdf]

| Abbreviation | Sound                         |
|--------------|-------------------------------|
| acr          | ascending cry                 |
| am           | ascending moan                |
| am-mcr       | ascending moan-modulated cry  |
| asq          | ascending squeal              |
| ati          | ascending trill               |
| ati-mcr      | ascending trill-modulated cry |
| c            | croak                         |
| cr           | cry                           |
| dcr          | descending cry                |
| dcr-am       | descending cry-ascending moan |
| dcr-t        | descending cry-trumpet        |
| dcr-w        | descending cry-woop           |
| dm           | descending moan               |
| dsq          | descending squeal             |
| dti          | descending trill              |
| g            | groan                         |
| gr           | grumble                       |
| gr-w         | grumble-woop                  |
| gt           | grunt                         |
| m            | moan                          |
| m-acr        | moan-ascending cry            |
| m-sq         | moan-squeal                   |
| m-w          | moan-woop                     |
| mcr          | modulated cry                 |
| mm           | modulated moan                |
| mti          | modulated trill               |
| mti-mcr      | modulated trill-modulated cry |
| mti-sq       | modulated trill-squeal        |
| p            | purr                          |
| pul-mm       | pulsative modulated moan      |
| rcht         | ratchet                       |
| sn(tn)       | snort train                   |
| sq           | squeal                        |
| sq-m         | squeal-moan                   |
| sqk          | squeak                        |
| sqk(tn)      | squeak train                  |
| t            | trumpet                       |
| ti           | trill                         |
| ti-cr        | trill-cry                     |
| ti-mcr       | trill-modulated cry           |
| ti-w         | trill-woop                    |
| w            | woop                          |
| w-mcr        | woop-modulated cry            |
| y            | yap                           |
| y(tn)        | yap train                     |
