# Supplementary material for: Culturally transmitted song exchange between humpback whales (Megaptera novaeangliae) in the southeast Atlantic and southwest Indian Ocean basins
Source: PubMed Central journal article supplement (PMC6281946; doi:10.1098/rsos.172305), 2018-11-28
Supplement: rsos172305supp3.pdf [file rsos172305supp3.pdf]

|             | Year | Individual | Song #                 | Theme sequence                 |
|-------------|------|------------|------------------------|--------------------------------|
| Gabon (BSB) | 2001 | 1          | 1                      | 1, 4, 5, 11, 1, 3              |
|             |      |            | 2                      | 1, 4, 5, 11, 1, 3              |
|             |      |            | 3                      | 1, 4, 5, 11, 1, 3              |
|             |      |            | 4                      | 1, 4, 5, 1, 3                  |
|             |      |            | 5                      | 1, 4, 5, 1, 3                  |
|             |      |            | 6                      | 1, 4, 5, 11, 1, 3              |
|             |      |            | 7                      | 1, 4, 5, 11, 1, 3              |
|             |      | 2          | 1                      | 1, 2, 3, 2                     |
|             |      |            | 2                      | 1, 2, 3, 2                     |
|             |      |            | 3                      | 1, 4, 5, 11                    |
|             |      |            | 4                      | 1, 2, 3, 2                     |
|             |      |            | 5                      | 1, 2                           |
|             |      |            | 6                      | 1, 3, 2                        |
|             |      |            | 7                      | 1, 2, 4, 5, 11                 |
|             |      |            | 8                      | 1, 3, 2                        |
|             | 2002 | 1          | 1                      | 7c, 8, 10, 14, 6               |
|             |      |            | 2                      | 7c, 8, 14, 7                   |
|             |      |            | 3                      | 7c, 8, 9s, 10, 14, 6, 7        |
|             |      |            | 4                      | 7c, 8, 10, 14, 7               |
|             |      |            | 5                      | 7c, 8, 9s, 4, 10, 14, 7        |
|             |      |            | 6                      | 7c, 8, 9s, 14, 6, 7            |
|             |      |            | 7                      | 7c, 8, 9s, 4, 10, 14           |
|             | 2003 | 1          | 1                      | 7s, 16, 18, 19s, 6, 20         |
|             |      |            | 2                      | 7s, 16, 18, 19s, 14, 6, 20     |
|             |      |            | 3                      | 7s, 16, 18, 19s, 14, 6, 20     |
|             |      |            | 4                      | 7s, 16, 18, 19s, 14, 6, 20     |
|             |      |            | 5                      | 7s, 16, 18, 19s, 6, 20         |
|             |      | 3          | 1                      | 7s, 16, 18, 19s, 14, 6, 20     |
|             |      | 4          | 1                      | 7s, 16, 17, 18, 19s, 14, 6, 20 |
|             |      |            | 2                      | 7s, 16, 18, 19s, 14, 6, 20     |
|             |      |            | 3                      | 7s, 16, 15, 18, 19s, 14, 6     |
|             |      |            | 4                      | 18, 19s, 14, 6, 20             |
|             |      | 6          | 1                      | 7s, 16, 15, 18, 19s, 14, 6, 20 |
|             |      |            | 2                      | 7s, 16, 15, 18, 19s, 14, 6, 20 |
|             |      |            | 3                      | 7s, 16, 15, 18, 19s, 14, 6     |
|             |      | 2004       | 1                      | 1                              |
|             | 3    |            | 1                      | 7s, 23, 17, 25, 24             |
|             | 5    |            | 1                      | 7s, 23, 17, 25, 18E, 24, 6     |
|             |      |            | 2                      | 7s, 23, 25, 18E, 24            |
| 3           |      |            | 7s, 23, 25, 18E, 24, 6 |                                |
| 2005        | 2    | 1          | 7s, 26, 24, 27         |                                |

|                  |                   |                   |                               |                         |
|------------------|-------------------|-------------------|-------------------------------|-------------------------|
| Madagascar (BSC) | 2001              |                   | 2                             | 7s, 26, 24, 26, 24, 27  |
|                  |                   |                   | 3                             | 7s, 26, 24              |
|                  |                   |                   | 4                             | 7s, 26, 24, 26, 24      |
|                  |                   |                   | 5                             | 7s, 26, 24              |
|                  |                   | 3                 | 1                             | 7s, 26, 27, 24          |
|                  |                   |                   | 2                             | 7s, 26, 27, 24          |
|                  |                   |                   | 3                             | 7s, 26, 24, 27, 26, 24  |
|                  |                   |                   | 4                             | 7s, 26, 27, 24          |
|                  |                   |                   | 5                             | 7s, 26, 27, 24, 27, 24  |
|                  |                   | 7                 | 1                             | 7s, 23E, 24, 18E, 24, 6 |
|                  |                   |                   | 2                             | 7s, 23E, 24, 6          |
|                  |                   |                   | 3                             | 7s, 23E, 24, 6          |
|                  |                   | 8                 | 1                             | 7s, 26, 24, 27          |
|                  |                   | 2                 | 1                             | 1, 2                    |
|                  |                   |                   | 2                             | 1, 4, 5, 11             |
|                  | 3                 |                   | 1, 3, 2, 3, 2, 3, 2, 4, 5, 11 |                         |
|                  | 4                 |                   | 1, 3, 2                       |                         |
|                  | 5                 |                   | 1, 2, 3, 2                    |                         |
|                  | 6                 |                   | 1, 3, 2, 3                    |                         |
|                  | 7                 |                   | 1, 3                          |                         |
| 8                | 1, 4, 5, 11, 3, 2 |                   |                               |                         |
| 9                | 1, 3, 2           |                   |                               |                         |
| 10               | 1, 3, 2           |                   |                               |                         |
| 11               | 1, 3, 2           |                   |                               |                         |
| 12               | 1, 4, 5, 11       |                   |                               |                         |
| 13               | 1, 3, 2           |                   |                               |                         |
| 14               | 1, 3, 2           |                   |                               |                         |
| 15               | 1, 3              |                   |                               |                         |
| 3                | 1                 | 1, 2, 3, 2        |                               |                         |
|                  | 2                 | 1, 2, 3, 2        |                               |                         |
|                  | 3                 | 1, 2, 3           |                               |                         |
|                  | 4                 | 1, 2, 3, 2        |                               |                         |
|                  | 5                 | 1, 4, 5, 11       |                               |                         |
|                  | 6                 | 1, 2, 3, 2        |                               |                         |
|                  | 7                 | 1, 2, 3           |                               |                         |
|                  | 8                 | 1, 2, 3, 2        |                               |                         |
|                  | 9                 | 1, 2, 3, 2        |                               |                         |
|                  | 10                | 1, 2, 3           |                               |                         |
|                  | 11                | 1, 3, 2           |                               |                         |
|                  | 12                | 1, 3, 2, 4, 5, 11 |                               |                         |
|                  | 13                | 2, 3, 2, 3        |                               |                         |
|                  | 14                | 1, 2, 3, 2        |                               |                         |
|                  | 15                | 3, 2, 3           |                               |                         |

|      |    |    |                        |
|------|----|----|------------------------|
|      |    | 16 | 1, 4, 5, 11, 2, 3      |
| 2002 | 1  | 1  | 7c, 12, 13             |
|      |    | 2  | 7c, 14, 7,             |
|      |    | 3  | 7c, 12, 13             |
|      |    | 4  | 7c, 13, 12             |
|      |    | 5  | 7c, 14, 10             |
|      |    | 6  | 7c, 13                 |
|      |    | 7  | 7c, 14, 10             |
|      | 2  | 1  | 7c, 13, 12, 13         |
|      |    | 2  | 7c, 12, 13, 12         |
|      |    | 3  | 7c, 12                 |
|      |    | 4  | 7c, 13, 12, 13         |
|      |    | 5  | 7c, 13, 12, 13, 12, 13 |
|      |    | 6  | 7c, 13, 14, 10         |
|      | 8  | 1  | 7c, 29, 14, 10         |
|      |    | 2  | 7c, 29, 12, 14,10      |
|      |    | 3  | 7c, 29, 12, 14, 10     |
| 2003 | 6  | 1  | 7s, 21, 15, 14         |
|      |    | 2  | 7s, 15, 14             |
|      | 9  | 1  | 7s, 21, 15, 6, 14      |
|      |    | 2  | 7s, 21, 15, 14, 6      |
|      |    | 3  | 7s, 21, 15, 6, 14      |
|      |    | 4  | 7s, 21, 15, 6, 14      |
|      |    | 5  | 7s, 21, 15, 6, 14, 6   |
|      | 10 | 1  | 7s, 21, 15, 14         |
|      |    | 2  | 7s, 21, 15, 14, 15, 14 |
|      |    | 3  | 7s, 21, 15, 14         |
|      |    | 4  | 7s, 21, 15             |
|      |    | 5  | 7s, 21, 15, 14         |
|      |    | 6  | 7s, 21, 15, 14         |
|      |    | 7  | 7s, 21, 15             |
|      | 13 | 1  | 7s, 21, 15, 6          |
|      |    | 2  | 7s, 6                  |
| 2004 | 1  | 1  | 7s, 23, 24, 25, 6      |
|      |    | 2  | 7s, 23, 24, 25, 6      |
|      |    | 3  | 7s, 23, 24, 25, 6      |
|      |    | 4  | 7s, 23, 24, 25, 6      |
|      |    | 5  | 7s, 23, 24, 25, 6      |
|      |    | 6  | 7s, 23, 24, 25, 6      |
|      | 8  | 1  | 7s, 23, 24, 25, 6      |
|      |    | 2  | 7s, 23, 24, 25, 6      |
|      |    | 3  | 7s, 23, 24, 25, 6      |
|      |    | 4  | 7s, 23, 24, 25, 6      |

|   |      |    |                |                     |
|---|------|----|----------------|---------------------|
|   |      |    | 5              | 7s, 23, 24, 25, 6   |
|   |      | 9  | 1              | 7s, 23, 24, 25, 6   |
|   |      |    | 2              | 7s, 23, 24, 25, 6   |
|   |      |    | 3              | 7s, 23, 24, 25, 6   |
|   |      |    | 4              | 7s, 23, 24, 25, 6   |
|   |      |    | 5              | 7s, 23, 24, 25, 6   |
|   |      |    | 6              | 7s, 23, 24          |
|   |      |    | 7              | 7s, 23, 24, 25, 6   |
|   |      | 11 | 1              | 7s, 23, 24, 25, 6   |
|   |      |    | 2              | 7s, 23, 24, 25, 6   |
|   |      |    | 3              | 7s, 23, 24, 25, 6   |
|   |      |    | 4              | 7s, 23, 24, 25, 6   |
|   |      |    | 5              | 7s, 23, 24, 25, 6   |
|   |      |    | 6              | 7s, 23, 24, 25, 6   |
|   | 2005 | 10 | 1              | 7s, 26, 24, 27      |
|   |      |    | 2              | 7s, 26, 24, 27      |
|   |      |    | 3              | 7s, 26, 24, 27      |
|   |      |    | 4              | 7s, 26, 24, 27      |
|   |      | 15 | 1              | 7s, 26, 24, 27      |
|   |      |    | 2              | 7s, 26, 24, 27      |
|   |      |    | 3              | 7s, 26, 24, 27      |
|   |      |    | 4              | 7s, 26, 24, 27      |
|   |      |    | 5              | 7s, 26, 24, 27      |
|   |      | 18 | 1              | 7s, 23E, 26, 24, 27 |
|   |      |    | 2              | 7s, 26, 24, 27      |
|   |      |    | 3              | 7s, 23E, 26, 24, 27 |
|   |      |    | 4              | 7s, 26, 24, 27      |
|   |      |    | 5              | 7s, 26, 24, 27      |
|   |      |    | 6              | 7s, 23E, 26, 24, 27 |
|   |      | 19 | 1              | 7s, 26, 24, 27      |
| 2 |      |    | 7s, 26, 24, 27 |                     |
| 3 |      |    | 7s, 26, 24, 27 |                     |
| 4 |      |    | 7s, 24, 27     |                     |
| 5 |      |    | 7s, 26, 24, 27 |                     |
| 6 |      |    | 7s, 26, 24, 27 |                     |
