# Supplementary material for: Culturally transmitted song exchange between humpback whales (Megaptera novaeangliae) in the southeast Atlantic and southwest Indian Ocean basins
Source: PubMed Central journal article supplement (PMC6281946; doi:10.1098/rsos.172305), 2018-11-28
Supplement: rsos172305supp4.pdf [file rsos172305supp4.pdf]

| DICE/LSI | GA.01.1 | GA.01.2 | MA.01.3 | MA.01.2 | GA.02.1 | MA.02.2 | MA.02.1 | MA.02.8 | GA.03.1 | GA.03.3 | GA.03.4 | GA.03.6 | MA.03.6 | MA.03.9 | MA.03.10 | MA.03.13 | GA.04.1 | GA.04.2 | GA.04.3 | GA.04.5 | MA.04.1 | MA.04.8 | MA.04.9 | MA.04.11 | GA.05.7 | GA.05.8 | GA.05.2 | GA.05.3 | MA.05.15 | MA.05.10 | MA.05.18 | MA.05.19 |        |      |
|----------|---------|---------|---------|---------|---------|---------|---------|---------|---------|---------|---------|---------|---------|---------|----------|----------|---------|---------|---------|---------|---------|---------|---------|----------|---------|---------|---------|---------|----------|----------|----------|----------|--------|------|
| GA.01.1  | 1/0.93  | 0.27    | 0.29    | 0.31    | 0.01    | 0       | 0       | 0       | 0       | 0       | 0       | 0       | 0       | 0       | 0        | 0        | 0       | 0       | 0       | 0       | 0       | 0       | 0       | 0        | 0       | 0       | 0       | 0       | 0        | 0        | 0        | 0        |        |      |
| GA.01.2  | 0.91    | 1/0.61  | 0.57    | 0.56    | 0.01    | 0       | 0       | 0       | 0       | 0       | 0       | 0       | 0       | 0       | 0        | 0        | 0       | 0       | 0       | 0       | 0       | 0       | 0       | 0        | 0       | 0       | 0       | 0       | 0        | 0        | 0        | 0        |        |      |
| MA.01.3  | 0.91    | 1       | 1/0.62  | 0.51    | 0.01    | 0       | 0       | 0       | 0       | 0       | 0       | 0       | 0       | 0       | 0        | 0        | 0       | 0       | 0       | 0       | 0       | 0       | 0       | 0        | 0       | 0       | 0       | 0       | 0        | 0        | 0        | 0        | 0      |      |
| MA.01.2  | 0.91    | 1       | 1       | 1/0.59  | 0.01    | 0       | 0       | 0       | 0       | 0       | 0       | 0       | 0       | 0       | 0        | 0        | 0       | 0       | 0       | 0       | 0       | 0       | 0       | 0        | 0       | 0       | 0       | 0       | 0        | 0        | 0        | 0        | 0      |      |
| GA.02.1  | 0       | 0       | 0       | 0       | 1/0.69  | 0.21    | 0.27    | 0.30    | 0.13    | 0.16    | 0.16    | 0.17    | 0.16    | 0.13    | 0.11     | 0.07     | 0.02    | NA      | 0       | 0.02    | 0.07    | 0.07    | 0.06    | 0.07     | 0.06    | 0       | 0       | 0       | 0        | 0        | 0        | 0        | 0      |      |
| MA.02.2  | 0       | 0       | 0       | 0       | 0.50    | 1/0.59  | 0.47    | 0.38    | 0.01    | 0.02    | 0.03    | 0.02    | 0.02    | 0.01    | 0        | 0        | 0       | 0       | 0       | 0       | 0       | 0       | 0       | 0        | 0       | 0       | 0       | 0       | 0        | 0        | 0        | 0        | 0      | 0    |
| MA.02.1  | 0       | 0       | 0       | 0       | 0.62    | 0.91    | 1/0.55  | 0.40    | 0.04    | 0.06    | 0.07    | 0.06    | 0.00    | 0.03    | 0.01     | 0        | 0       | 0       | 0       | 0       | 0       | 0       | 0       | 0        | 0       | 0       | 0       | 0       | 0        | 0        | 0        | 0        | 0      | 0    |
| MA.02.8  | 0       | 0       | 0       | 0       | 0.50    | 0.80    | 0.73    | 1/0.76  | 0.06    | 0.10    | 0.09    | 0.09    | 0.11    | 0.05    | 0.05     | 0        | 0       | 0       | 0       | 0       | 0       | 0       | 0       | 0        | 0       | 0       | 0       | 0       | 0        | 0        | 0        | 0        | 0      | 0    |
| GA.03.1  | 0       | 0       | 0       | 0       | 0.29    | 0.17    | 0.15    | 0.17    | 1/0.93  | 0.94    | 0.76    | 0.77    | 0.24    | 0.33    | 0.21     | 0.30     | 0.14    | NA      | 0.15    | 0.18    | 0.30    | 0.30    | 0.28    | 0.30     | 0.28    | 0.15    | 0.15    | 0.15    | 0.15     | 0.15     | 0.15     | 0.15     | 0.15   | 0.15 |
| GA.03.3  | 0       | 0       | 0       | 0       | 0.29    | 0.17    | 0.15    | 0.17    | 1       | 1       | 0.83    | 0.82    | 0.29    | 0.34    | 0.24     | 0.29     | 0.14    | NA      | 0.14    | 0.19    | 0.29    | 0.29    | 0.27    | 0.29     | 0.29    | 0.14    | 0.14    | 0.14    | 0.14     | 0.14     | 0.14     | 0.14     | 0.14   | 0.14 |
| GA.03.4  | 0       | 0       | 0       | 0       | 0.25    | 0.14    | 0.13    | 0.14    | 0.88    | 0.88    | 1/0.76  | 0.78    | 0.27    | 0.33    | 0.22     | 0.27     | 0.20    | NA      | 0.13    | 0.17    | 0.21    | 0.21    | 0.19    | 0.21     | 0.24    | 0.10    | 0.10    | 0.10    | 0.10     | 0.10     | 0.10     | 0.10     | 0.10   | 0.10 |
| GA.03.6  | 0       | 0       | 0       | 0       | 0.27    | 0.15    | 0.14    | 0.15    | 0.93    | 0.93    | 0.94    | 1/0.94  | 0.39    | 0.45    | 0.36     | 0.33     | 0.26    | NA      | 0.13    | 0.22    | 0.26    | 0.26    | 0.24    | 0.26     | 0.26    | 0.13    | 0.13    | 0.13    | 0.13     | 0.13     | 0.13     | 0.13     | 0.13   | 0.13 |
| MA.03.6  | 0       | 0       | 0       | 0       | 0.18    | 0.22    | 0.20    | 0.22    | 0.36    | 0.36    | 0.46    | 0.50    | 1/0.88  | 0.68    | 0.74     | 0.46     | 0.14    | NA      | 0.20    | 0.17    | 0.20    | 0.20    | 0.21    | 0.20     | 0.22    | 0.25    | 0.24    | 0.22    | 0.25     | 0.25     | 0.23     | 0.26     | 0.26   |      |
| MA.03.9  | 0       | 0       | 0       | 0       | 0.33    | 0.20    | 0.18    | 0.20    | 0.50    | 0.50    | 0.57    | 0.62    | 0.89    | 1/0.85  | 0.70     | 0.58     | 0.20    | NA      | 0.19    | 0.21    | 0.27    | 0.27    | 0.26    | 0.27     | 0.34    | 0.19    | 0.19    | 0.18    | 0.19     | 0.19     | 0.19     | 0.19     | 0.19   |      |
| MA.03.10 | 0       | 0       | 0       | 0       | 0.18    | 0.22    | 0.20    | 0.22    | 0.36    | 0.36    | 0.46    | 0.50    | 1       | 0.89    | 1/0.82   | 0.49     | 0.14    | NA      | 0.20    | 0.17    | 0.20    | 0.20    | 0.20    | 0.20     | 0.21    | 0.24    | 0.22    | 0.21    | 0.24     | 0.24     | 0.22     | 0.24     | 0.24   |      |
| MA.03.13 | 0       | 0       | 0       | 0       | 0.17    | 0       | 0       | 0       | 0.50    | 0.50    | 0.57    | 0.62    | 0.67    | 0.89    | 0.67     | 1/0.78   | 0.29    | NA      | 0.20    | 0.27    | 0.40    | 0.40    | 0.38    | 0.40     | 0.44    | 0.25    | 0.24    | 0.22    | 0.25     | 0.25     | 0.23     | 0.26     | 0.26   |      |
| GA.04.1  | 0       | 0       | 0       | 0       | 0.14    | 0       | 0       | 0       | 0.29    | 0.29    | 0.38    | 0.27    | 0.18    | 0.33    | 0.18     | 0.33     | 1       | NA      | 0.71    | 0.86    | 0.57    | 0.57    | 0.55    | 0.57     | 0.48    | 0.29    | 0.29    | 0.29    | 0.29     | 0.29     | 0.29     | 0.29     | 0.29   |      |
| GA.04.2  | 0       | 0       | 0       | 0       | 0.15    | 0       | 0       | 0       | 0.31    | 0.31    | 0.40    | 0.29    | 0.20    | 0.36    | 0.30     | 0.36     | 0.92    | 1       | NA      | NA      | NA      | NA      | NA      | NA       | NA      | NA      | NA      | NA      | NA       | NA       | NA       | NA       | NA     |      |
| GA.04.3  | 0       | 0       | 0       | 0       | 0.14    | 0       | 0       | 0       | 0.43    | 0.43    | 0.50    | 0.40    | 0.18    | 0.33    | 0.18     | 0.33     | 0.86    | 0.92    | 1       | 0.60    | 0.60    | 0.60    | 0.60    | 0.60     | 0.60    | 0.24    | 0.20    | 0.35    | 0.37     | 0.20     | 0.20     | 0.20     | 0.20   |      |
| GA.04.5  | 0       | 0       | 0       | 0       | 0.14    | 0       | 0       | 0       | 0.29    | 0.29    | 0.38    | 0.27    | 0.18    | 0.33    | 0.18     | 0.33     | 1       | 0.92    | 0.86    | 1/0.87  | 0.49    | 0.49    | 0.49    | 0.49     | 0.44    | 0.27    | 0.32    | 0.31    | 0.27     | 0.27     | 0.27     | 0.27     | 0.27   |      |
| MA.04.1  | 0       | 0       | 0       | 0       | 0.17    | 0       | 0       | 0       | 0.33    | 0.33    | 0.29    | 0.31    | 0.22    | 0.40    | 0.22     | 0.40     | 0.83    | 0.91    | 0.83    | 0.83    | 1       | 1       | 0.94    | 1.00     | 0.57    | 0.40    | 0.39    | 0.25    | 0.40     | 0.40     | 0.30     | 0.40     | 0.40   |      |
| MA.04.8  | 0       | 0       | 0       | 0       | 0.17    | 0       | 0       | 0       | 0.33    | 0.33    | 0.29    | 0.31    | 0.22    | 0.40    | 0.22     | 0.40     | 0.83    | 0.91    | 0.83    | 0.83    | 1       | 1       | 1       | 1.00     | 0.57    | 0.40    | 0.39    | 0.25    | 0.40     | 0.40     | 0.30     | 0.40     | 0.40   |      |
| MA.04.9  | 0       | 0       | 0       | 0       | 0.17    | 0       | 0       | 0       | 0.33    | 0.33    | 0.29    | 0.31    | 0.22    | 0.40    | 0.22     | 0.40     | 0.83    | 0.91    | 0.83    | 0.83    | 1       | 1       | 1/0.90  | 0.94     | 0.55    | 0.41    | 0.40    | 0.28    | 0.41     | 0.41     | 0.32     | 0.41     | 0.41   |      |
| MA.04.11 | 0       | 0       | 0       | 0       | 0.17    | 0       | 0       | 0       | 0.33    | 0.33    | 0.29    | 0.31    | 0.22    | 0.40    | 0.22     | 0.40     | 0.83    | 0.91    | 0.83    | 0.83    | 1       | 1       | 1       | 1        | 0.57    | 0.40    | 0.39    | 0.25    | 0.40     | 0.40     | 0.30     | 0.40     | 0.40   |      |
| GA.05.7  | 0       | 0       | 0       | 0       | 0.17    | 0       | 0       | 0       | 0.33    | 0.33    | 0.29    | 0.31    | 0.22    | 0.40    | 0.22     | 0.40     | 0.67    | 0.55    | 0.50    | 0.67    | 0.60    | 0.60    | 0.60    | 0.60     | 1/0.85  | 0.44    | 0.43    | 0.30    | 0.44     | 0.44     | 0.51     | 0.44     | 0.44   |      |
| GA.05.8  | 0       | 0       | 0       | 0       | 0       | 0       | 0       | 0       | 0.18    | 0.18    | 0.15    | 0.17    | 0.25    | 0.22    | 0.25     | 0.22     | 0.36    | 0.40    | 0.36    | 0.36    | 0.44    | 0.44    | 0.44    | 0.44     | 0.44    | 1       | 0.75    | 0.57    | 1        | 1.00     | 0.90     | 0.96     | 0.96   |      |
| GA.05.2  | 0       | 0       | 0       | 0       | 0       | 0       | 0       | 0       | 0.18    | 0.18    | 0.15    | 0.17    | 0.25    | 0.22    | 0.25     | 0.22     | 0.36    | 0.40    | 0.36    | 0.36    | 0.44    | 0.44    | 0.44    | 0.44     | 0.44    | 1       | 1/0.74  | 0.61    | 0.75     | 0.75     | 0.68     | 0.71     | 0.71   |      |
| GA.05.3  | 0       | 0       | 0       | 0       | 0       | 0       | 0       | 0       | 0.18    | 0.18    | 0.15    | 0.17    | 0.25    | 0.22    | 0.25     | 0.22     | 0.36    | 0.40    | 0.36    | 0.36    | 0.44    | 0.44    | 0.44    | 0.44     | 0.44    | 1       | 1       | 1/0.81  | 0.57     | 0.57     | 0.50     | 0.56     | 0.56   |      |
| MA.05.15 | 0       | 0       | 0       | 0       | 0       | 0       | 0       | 0       | 0.18    | 0.18    | 0.15    | 0.17    | 0.25    | 0.22    | 0.25     | 0.22     | 0.36    | 0.40    | 0.36    | 0.36    | 0.44    | 0.44    | 0.44    | 0.44     | 0.44    | 1       | 1       | 1       | 1        | 1        | 0.90     | 0.96     | 0.96   |      |
| MA.05.10 | 0       | 0       | 0       | 0       | 0       | 0       | 0       | 0       | 0.18    | 0.18    | 0.15    | 0.17    | 0.25    | 0.22    | 0.25     | 0.22     | 0.36    | 0.40    | 0.36    | 0.36    | 0.44    | 0.44    | 0.44    | 0.44     | 0.44    | 1       | 1       | 1       | 1        | 1        | 0.90     | 0.96     | 0.96   |      |
| MA.05.18 | 0       | 0       | 0       | 0       | 0       | 0       | 0       | 0       | 0.17    | 0.17    | 0.14    | 0.15    | 0.22    | 0.20    | 0.22     | 0.20     | 0.33    | 0.36    | 0.33    | 0.33    | 0.40    | 0.40    | 0.40    | 0.40     | 0.60    | 0.89    | 0.89    | 0.89    | 0.89     | 0.89     | 0.89     | 0.89     | 0.86   |      |
| MA.05.19 | 0       | 0       | 0       | 0       | 0       | 0       | 0       | 0       | 0.18    | 0.18    | 0.15    | 0.17    | 0.25    | 0.22    | 0.25     | 0.22     | 0.36    | 0.40    | 0.36    | 0.36    | 0.44    | 0.44    | 0.44    | 0.44     | 0.44    | 1       | 1       | 1       | 1        | 1        | 0.89     | 1/0.93   | 1/0.93 |      |
